1 **DIVERGENT IMMUNE PRIMING RESPONSES ACROSS FLOUR BEETLE**

2 **LIFE STAGES AND POPULATIONS**

3

4 Imroze Khan<sup>\*,+</sup>, Arun Prakash<sup>+</sup> and Deepa Agashe<sup>\*</sup>

5

6 National Centre for Biological Sciences

7 Tata Institute of Fundamental Research

8 GKVK, Bellary Road

9 Bangalore, India 560065

10

11 <sup>+</sup> Equal contribution

12

13 <sup>\*</sup> Correspondence

14 [imrozek@ncbs.res.in](mailto:imrozek@ncbs.res.in)

15 [dagashe@ncbs.res.in](mailto:dagashe@ncbs.res.in)

16 Telephone: +91 80 2366 6524/ + 96323 08942

17

18 Fax: +91 80 2363 6662

19

20

21 **RUNNING TITLE:**

22 Immune priming in natural insect populations

23

24

25

26

27

## 28 ABSTRACT

29

30 Growing evidence shows that low doses of pathogens may prime the immune  
 31 response in many insects, conferring subsequent protection against infection in the  
 32 same developmental stage (within life stage priming), across life stages (ontogenic  
 33 priming), or to offspring (trans-generational priming). Recent work also suggests that  
 34 immune priming is a costly response. Thus, depending on host and pathogen ecology  
 35 and evolutionary history, tradeoffs with other fitness components may constrain the  
 36 evolution of priming. However, the relative impacts of priming at different life stages  
 37 and across natural populations remain unknown. We quantified immune priming  
 38 responses of 10 natural populations of the red flour beetle *Tribolium castaneum*,  
 39 primed and infected with the natural insect pathogen *Bacillus thuringiensis*. We found  
 40 that priming responses were highly variable both across life stages and populations,  
 41 ranging from no detectable response to a 13-fold survival benefit. Comparing across  
 42 stages, we found that ontogenic immune priming at the larval stage conferred  
 43 maximum protection against infection. Finally, we found that various forms of  
 44 priming showed sex-specific associations that may represent tradeoffs or shared  
 45 mechanisms. These results suggest that sex-, life stage-, and pathogen- specific  
 46 selective pressures can cause substantial divergence in priming responses even within  
 47 a species. Our work highlights the necessity of further work to understand the  
 48 mechanistic basis of this variability.

49

50 **Keywords:** Within generation immune priming, ontogenic immune priming, trans-  
 51 generational immune priming, wild populations, variability, *Tribolium castaneum*

52

## 53 INTRODUCTION

54

55 Immunologists have long assumed that insects lack immune memory and specificity  
 56 because they do not have the lymphocytes and functional antibodies that are  
 57 responsible for acquired immunity in vertebrates (Janeway & Medzhitov, 2002).  
 58 However, growing evidence suggests that a low dose of a pathogen may prime the  
 59 immune response in insects, reducing the risk and severity of infection by the same  
 60 pathogen later in life. Evidence for such priming-induced immune protection has been  
 61 reported in many insects including mealworm beetles (Daukšte *et al.*, 2012), bumble  
 62 bees (Sadd & Schmid-Hempel, 2006; Tidbury *et al.*, 2011), silkworms (Miyashita *et*  
 63 *al.*, 2014), fruit flies (Pham *et al.*, 2007), mosquitoes (Contreras-Garduño *et al.*, 2014)  
 64 and flour beetles (Roth *et al.*, 2009). Immune priming can also confer sustained  
 65 protection via (A) ontogenic priming, where the benefit of priming can persist through  
 66 metamorphosis (Thomas & Rudolf, 2010; Moreno-García *et al.*, 2015) and (B) trans-  
 67 generational immune priming, where the benefits are manifested in the next  
 68 generation (Sadd & Schmid-Hempel, 2006; Sadd & Schmid-hempel, 2009; Moreau *et*  
 69 *al.*, 2012; Zanchi *et al.*, 2012; Dubuffet *et al.*, 2015). Theoretical models show that  
 70 within- and trans- generational immune priming can significantly alter pathogen  
 71 persistence (Tidbury *et al.*, 2012) and reduce infection intensity in populations (Tate  
 72 & Rudolf, 2012). Thus, it is clear that immunological memory is widespread in  
 73 insects, and immune priming may have large impacts on the outcome of host-  
 74 pathogen interactions.

75 Although we have begun to understand immune priming in many insects, it is not  
 76 clear how priming evolves. This is partly because the strength, consistency and  
 77 relevance of immune priming in natural populations remains largely unexplored and

78 is difficult to gauge from laboratory studies. Other aspects of immune function (post-  
79 infection survival and encapsulation ability) vary across fruit fly populations  
80 (Kraaijeveld, 1995; Corby-Harris & Promislow, 2008), and parasite burden is strongly  
81 correlated with the strength of the innate immune response across damselfly  
82 populations (Kaunisto & Suhonen, 2013). Similarly, immune priming responses may  
83 also vary across natural populations. In laboratory populations, immune priming is  
84 affected by the presence of other pathogens (Sadd & Schmid-hempel, 2009) and food  
85 availability (Freitak *et al.*, 2009). However, the impact of these factors on immune  
86 priming in natural populations is unknown. Wild populations likely face substantial  
87 spatial and temporal variation in pathogen diversity, pathogen abundance, and  
88 resource availability, generating variability in the strength of selection on immune  
89 priming. Priming also imposes fitness costs in some laboratory populations  
90 (Contreras-Garduño *et al.*, 2014), potentially generating tradeoffs with other immune  
91 responses, or between different types of immune priming. Finally, these fitness costs  
92 may also vary as a function of sex and developmental stage. For instance, life-history  
93 theory predicts that females should generally evolve higher immune competence than  
94 males (Rolff, 2002; Nunn *et al.*, 2009); hence, males may gain more benefits from  
95 priming than females (Moreno-García *et al.*, 2015). Similarly, variable costs of  
96 infection across life stages are also predicted to select for stronger priming responses  
97 at specific developmental stages (Tate & Rudolf, 2012). A detailed analysis of such  
98 variability can indicate factors that influence the evolution of immune priming.  
99 Unfortunately, very few studies have quantified priming in wild insect populations  
100 (but see (Reber & Chapuisat, 2012) (ants), (Gonzalez-Tokman *et al.*, 2010)  
101 (damselflies), and (Tate & Graham, 2015) (closely related flour beetle species)), and

102 none have measured variation in priming responses across multiple natural  
103 populations.

104

105 We systematically analyzed immune priming responses of 10 populations of the red  
106 flour beetle *Tribolium castaneum* collected from different locations across India (Fig  
107 S1). In the laboratory, flour beetles show within life stage (WLS) (Roth *et al.*, 2009),  
108 ontogenic (ONT) (Thomas & Rudolf, 2010) and trans-generational (TG) immune  
109 priming (Roth *et al.*, 2010), making them an ideal model system to understand the  
110 occurrence and abundance of these different types of immune priming responses. We  
111 addressed three major questions: (a) Does the immune priming response vary across  
112 natural populations and as a function of sex and life stage? (b) Are the different types  
113 of priming responses equally beneficial? (c) Are the different types of immune  
114 priming responses correlated? Our work is the first report of large within-species  
115 variability of priming response across sexes and life stages in natural insect  
116 populations. We found that ontogenic immune priming provided greater protection  
117 against re-infection, compared to within life stage or trans-generational priming.  
118 Finally, our data reveal novel sex-specific links between various forms of immune  
119 priming, perhaps representing tradeoffs or even shared mechanistic basis. We hope  
120 that our results motivate further investigations to confirm and understand the  
121 ecological, evolutionary and mechanistic basis of the observed variability and  
122 associations between priming at different stages.

123

124

125

126

## 127    **METHODS**

128

### 129    **Beetle collection and experimental individuals**

130

131    Although immune priming responses should be measured on individuals directly  
 132    collected from the wild (i.e. grain warehouses), this is difficult to do for the following  
 133    reasons. First, natural beetle populations do not always have enough individuals of  
 134    different stages to allow sufficient replication. Second, it is impossible to account for  
 135    the many factors that may increase within-population variability in immune  
 136    responses, such as individual age, migration and diet history, and immediate local  
 137    environment. Controlling for within-population variability in immune priming is  
 138    essential to quantify variability between populations, which was the major goal of our  
 139    study. Hence, we established large laboratory populations using wild-collected beetles  
 140    (maintaining most of the initial genetic variability), and then quantified the immune  
 141    priming response of individuals of the same age reared under identical conditions. We  
 142    collected 50-100 *T. castaneum* adults from a grain warehouse in each of 9 cities  
 143    across India. Of the 10 populations analyzed here, 8 were from different cities and 2  
 144    were collected from different warehouses in a single city (Fig S1). We allowed all  
 145    adults from a site to oviposit for a week on whole-wheat flour at 34°C to start a large  
 146    laboratory population (>2000 individuals). We maintained these stock populations on  
 147    a 45-day discrete generation cycle for 9-10 generations before starting experiments.

148

149    To generate experimental individuals of equivalent age from all populations, we  
 150    allowed ~1000 adults from each population to oviposit in 350 g wheat flour for 48  
 151    hours. We removed the adults and allowed offspring to develop for ~3 weeks until

152 pupation, collecting pupae daily after this period. We housed 3-4 pupae of each sex  
 153 separately in 2 ml micro-centrifuge tubes containing 1 g flour for 2 weeks. Since  
 154 pupae typically eclose in 3-4 days, we obtained ~11-day-old sexually mature virgin  
 155 adults for immune priming experiments. For experiments with larvae, we allowed  
 156 adults to oviposit in 350 g flour for 24 hours and collected larvae after 10 days (eggs  
 157 hatch in 2-3 days; thus, experimental larvae were ~8 days old). In a separate  
 158 experiment, we found that eggs from all populations developed at a similar rate (Fig  
 159 S2), confirming that we tested all populations at equivalent developmental stages.

160

# **161 Immune priming and challenge**

162

163 For each type of immune priming, we tested all populations together to allow a direct  
 164 comparison across populations. However, given logistical constraints, we had to test  
 165 males and females in separate blocks. Note that we only measured maternal TG  
 166 immune priming in our experiments, and did not measure paternal TG priming. The  
 167 timeline for each type of immune priming is given in Fig 1 (see supplementary  
 168 information for detailed methods). For all infections, we used a strain of *Bacillus*  
 169 *thuringiensis* (DSM. No. 2046). Originally isolated from a Mediterranean flour moth,  
 170 this is a natural insect pathogen that imposes significant mortality in flour beetles  
 171 (Abdel-Razek *et al.*, 1999). On the evening before priming, we inoculated 10 ml  
 172 nutrient broth (Difco) with cells from a -80°C stock of *B. thuringiensis*. We incubated  
 173 the growing culture overnight in a shaker at 30°C until it reached an optical density of  
 174 0.95 (measured at 600 nm in a Metertech UV/Vis Spectrophotometer, SP8001). We  
 175 centrifuged the culture at 5000 rpm for 10 minutes, removed the supernatant, and  
 176 resuspended the pellet in 100µl insect Ringer solution (7.5g NaCl, 0.35g KCl, 0.21g

177 CaCl<sub>2</sub> per liter) to make bacterial slurry. We killed the bacteria in a heat block at 90°C  
178 for 20 minutes as described earlier (Roth *et al.*, 2009; Khan *et al.*, 2015). We used  
179 heat-killed bacteria to prime individuals, since this would elicit an immune response  
180 without any direct cost of infection.

181

182 To prime individuals, we pricked them with a 0.1 mm minuten pin (Fine Science  
183 Tools, Fosters City, CA) dipped either in heat-killed bacteria (primed) or in sterile  
184 insect Ringer solution (control). To minimize damage to internal organs we pricked  
185 individuals laterally between the head and thorax (adults) or between the last two  
186 segments (larvae). After priming (or mock priming), we isolated individuals in wells  
187 of 96-well microplates containing flour. When appropriate, we sexed pupae and  
188 distributed them individually in wells of 96-well microplates. For subsequent immune  
189 challenge, we pricked individuals as described above, but used live bacterial slurry  
190 (without heat-killing). After this, we again isolated individuals in fresh microplates  
191 and monitored their survival (See Fig 1 for timeline).

192

### 193 **Data analysis**

194

195 We analyzed post-infection survival data for each population, sex and immune  
196 priming type separately using Cox Proportional Hazard survival analysis with priming  
197 treatment as a fixed factor (see Figs S3-S11 for survival curves). We noted  
198 individuals that were still alive at the end of the experiment as censored values. We  
199 calculated the strength of a given type of immune priming response within each  
200 population (and sex) as the estimated hazard ratio of unprimed vs. primed groups  
201 (hazard ratio = rate of deaths occurring in unprimed group/ rate of deaths occurring in



202 primed group). A hazard ratio significantly greater than one indicates a greater risk of  
203 death after infection in the unprimed (control) compared to primed individuals.

204

205 To estimate the overall impact of sex on the immune priming response, we analyzed  
206 hazard ratios using a two-way ANOVA with sex and type of immune priming as fixed  
207 factors. We excluded data from larval within life stage priming (L-WLS) because sex  
208 cannot be distinguished in larvae. To test whether the strength of the priming response  
209 varies as a function of life stage at priming (larvae vs. adults), we analyzed hazard  
210 ratios with a one-way ANOVA. Finally, to compare the strength of priming across  
211 different stages (Fig 1), we analyzed data with a one-way ANOVA and used Tukey's  
212 honest significant difference (HSD) to estimate pairwise differences after correcting  
213 for multiple comparisons.

214

215 We also wanted to test whether the strength of immune priming responses was  
216 correlated across types of priming. However, several populations did not show a  
217 significant immune priming response; hence, we could not use a linear regression  
218 approach. Therefore, we generated a contingency table, categorizing each population  
219 according to the presence (proportional hazard test:  $p < 0.05$ ) or absence (proportional  
220 hazard test:  $p > 0.05$ ) of each type of priming response (also see Figs S3-S11). We  
221 then used a Fisher's exact test to determine whether the presence of the two types of  
222 immune priming was qualitatively associated across populations.

223

224

225

226

## 227     **RESULTS**

228

### 229     **The immune priming response varies across populations**

230

231     We estimated the strength of immune priming as the proportional hazard ratio of  
 232     individuals mock-primed with sterile Ringer solution vs. primed with a pathogen  
 233     (heat-killed *B. thuringiensis*), followed by a subsequent infection with live *B.*  
 234     *thuringiensis*. Surprisingly, we found that only about half the populations showed  
 235     significant priming at a given stage, although all populations were capable of  
 236     mounting multiple forms of immune priming (Fig 2). The immune priming response  
 237     varied substantially in larvae as well as adult males and females across natural  
 238     populations (Fig 2; Figs S3-S11). We found that only a few populations showed  
 239     significant within life stage immune priming as larvae (L-WLS, 4/10 populations) or  
 240     as adults (only females; A-WLS, 4/10 populations) (Fig 2A). In contrast, at least one  
 241     sex of many populations showed significant ontogenic (ONT, 9/10 populations; Fig  
 242     2B) and trans-generational benefits of adult priming (A-TG, 6/10 populations; Fig  
 243     2C). Our data also demonstrate long ranging impact of trans-generational immune  
 244     priming in several populations (L-TG, 6/10 populations; Fig 2D), whereby priming  
 245     larvae improved post-infection survival of their adult offspring. Finally, we found that  
 246     populations B1 and B2 showed very different priming responses (Fig 2), although  
 247     they were collected from different warehouses in the same city. Hence, geographical  
 248     proximity does not seem to be a good predictor of similarity in immune responses.

249

250

251

## 252 **Effect of sex on immune priming**

253

254 As explained in the methods, we tested the priming response of each sex separately.  
 255 Hence, we could not directly test for an impact of sex in each population. Combining  
 256 hazard ratios across populations, we did not find a consistent impact of sex on the  
 257 strength of the immune priming response for any type of priming (Table 1A-C).  
 258 However, in many populations, only one sex showed a significant priming response.  
 259 For instance, the adult WLS response appears to be female-limited, with males  
 260 showing no priming in any population (Fig 2A). Similarly, in most populations that  
 261 showed ontogenic priming, priming was beneficial for only one sex (7/9 populations;  
 262 Fig 2B). However, unlike WLS, we did not find a systematic benefit of ONT priming:  
 263 the sex that benefited from ONT priming varied across populations. We also failed to  
 264 find clear sex-specific benefits of TG priming for offspring. We observed adult  
 265 maternal immune priming (A-TG) in offspring of both sexes (4 populations) or only  
 266 one sex (2 populations) (Fig 2C). Intriguingly, all six populations with significant  
 267 larval trans-generational (L-TG) priming showed a response in offspring of both sexes  
 268 (Fig 2D). Thus, both males and females tend to show parallel benefits of L-TG  
 269 priming across populations. Overall, our results show that the impact of sex on  
 270 immune priming varies both across populations and type of immune priming.

271

## 272 **Larval ontogenic priming maximizes protection against subsequent infection**

273

274 Next, we tested the impact of priming life stage on the strength of the priming  
 275 response. We found that priming at the larval stage was more beneficial and produced  
 276 a greater response than priming adults (Table 1D). However, this result was driven

277 primarily by ontogenic larval priming, which maximized post-infection survival in  
278 adults across priming types relative to the respective unprimed controls (Fig 3, Table  
279 1E). Larval ONT priming resulted in a ~3 fold survival benefit, compared to the 2-  
280 fold benefit observed for other forms of priming, including larval WLS priming (Fig  
281 3). We also found that across populations, the strength of ONT priming in females  
282 was more variable compared to WLS, L-TG or A-TG priming (Bartlett's test for  
283 homogeneity of variance,  $p < 0.02$  for each pairwise comparison; compare boxplots in  
284 Fig 3). For males, ONT priming was significantly more variable than WLS priming,  
285 but not other forms of priming. Together, our results suggest that among different  
286 types of immune priming, ONT priming responses are strongest and most variable.

287

## 288 **Associations between within- and trans- generation immune priming**

289

290 We tested whether different types of immune priming responses were associated  
291 within populations. We found that most populations either showed significant female  
292 WLS priming or significant TG priming in male offspring, but not both (Fig 4A;  
293 Fisher's exact test,  $p = 0.046$ ). In contrast, there was no association between female  
294 WLS and TG priming in female offspring (Fig S12A; Fisher's exact test,  $p = 0.643$ ).  
295 We also found a non-significant trend for an association between ONT priming in  
296 males and TG priming in male offspring (Fig 4B; Fisher's exact test,  $p = 0.446$ ), but  
297 not for female offspring (Fig S12B; Fisher's exact test,  $p = 0.663$ ). For male  
298 offspring, one of the two populations that showed only ONT priming had nearly  
299 significant TG priming (population AM, Fig 4B;  $p = 0.066$ ). If this population were  
300 counted as showing both types of priming, the association between ONT and male TG  
301 priming would be significant (Fisher's exact test,  $p = 0.046$ ). Although the association

is not strong, these results suggest that in populations where male adults benefit from larval ONT priming, they may also benefit from maternal TG immune priming. Overall, our results indicate that trans-generational immune priming responses are associated with within-generation responses, but the association is limited to male offspring.

## DISCUSSION

Our work provides the first evidence of substantial variation in both within- and trans-generational immune priming responses among natural populations of an insect. Approximately half the populations did not show a significant response to any given type of priming; on the other hand, all populations showed at least two forms of priming. Relative to unprimed controls, primed individuals showed up to 13-fold higher survival in some cases, whereas others showed no benefits of priming. Note that we reared wild-collected beetles under standard laboratory conditions for 9-10 generations before starting our experiments; hence, we probably underestimated the variation in priming responses across populations. What is the cause of this variability? Potential hypotheses include gain and loss of priming responses via genetic drift; local adaptation to specific pathogen diversity and abundance (Sutton *et al.*, 2011); variable life-history related costs associated with immune investment (Roy & Kirchner, 2000; Miller *et al.*, 2006); and variable susceptibility to pathogens (Best *et al.*, 2013). Currently, we cannot directly test these hypotheses since we do not have information on the local pathogen pressure experienced by our beetle populations, the fitness costs of immune priming, or their relative susceptibility to *B. thuringiensis*. Nonetheless, our work demonstrates the importance of quantifying variability of

immune priming responses in natural populations, and sets up a framework to understand the evolution of immune priming responses.

One of our most interesting findings is that ontogenic priming confers a greater survival benefit than within life stage or trans-generational immune priming response.

A recent theoretical model predicts that if adults incur higher costs of infection than larvae, selection should favor strong ontogenic priming that reduces the proportion of susceptible adults (Tate & Rudolf, 2012). On the other hand, trans-generational priming should be favored when larvae are more susceptible to infection than adults.

Thus, if *B. thuringiensis* imposes stage-specific costs of infection in *T. castaneum*, it may have selected for stronger ontogenic priming in our populations. In a separate experiment, we found that larvae and adults from a laboratory-adapted, outcrossed flour beetle population were equally susceptible to *B. thuringiensis* infection (Fig S13A). These data suggest that beetle life stages are not differentially susceptible to infection, although it is possible that our natural populations do show stage-specific susceptibility. Another interesting result from our analysis is that the strength of larval TG priming is similar to the strength of adult TG priming, but much weaker than larval ontogenic priming. Thus, the high survival benefit of ONT priming (through metamorphosis) is not transmitted to the next generation. Thus, we speculate that during oviposition, priming is “reset”, perhaps because the mechanisms responsible for ontogenic and trans-generational priming are different. Further empirical studies are thus critical to elucidate the complex interplay between immune priming types and their relative impact on the outcome of infection within a population.

351 Our data also revealed novel associations between within- and trans-generational  
 352 immune priming responses. In populations where adult females showed significant  
 353 within life stage immune priming, male offspring did not show trans-generation  
 354 priming. We speculate that this negative relationship may reflect a trade-off between  
 355 maternal and offspring immunity (Moreau *et al.*, 2012): transferring immunity to  
 356 offspring may be costly for females who also bear the cost of their own immune  
 357 priming response. However, this needs to be explicitly tested by quantifying the  
 358 difference in the priming response of offspring of individual females that were primed  
 359 and challenged as adults, vs. females that were not primed and challenged. Our results  
 360 also suggest a weak association between male ONT and male TG priming.  
 361 Interestingly, both relationships between trans-generational and within-generation  
 362 priming were limited to male offspring. Such male-specific associations may arise  
 363 due to sex-specific variation in infection susceptibility, investment in other immune  
 364 components, or tradeoffs with other fitness components. We cannot test these  
 365 predictions since the relative impact of *B. thuringiensis* infection in both sexes is  
 366 unknown in natural beetle populations. However, separate experiments with an  
 367 outbred *T. castaneum* population showed that infected males die about twice as fast as  
 368 females (Fig S13B). It is possible that the natural populations analysed here also show  
 369 similar sex-specific variation in susceptibility to infection, and further work is  
 370 necessary to distinguish between these hypotheses.

371

372 We suggest that our results are applicable in many insect-pathogen systems. *B.*  
 373 *thuringiensis* infects multiple insect hosts (Bravo *et al.*, 2011), and is commonly  
 374 found in diverse habitats such as soil, insect cadavers, water and grain dust (Argôlo-  
 375 filho & Loguercio, 2014; Lambert & Peferoen, 2014). Hence, *B. thuringiensis* may

376 impose strong selection on many insects occupying diverse ecological niches,  
 377 influencing the evolution of their immune responses in the wild. Although we did not  
 378 test whether the immune priming response is specific to the *B. thuringiensis* strain  
 379 that we used, an earlier study showed that *T. castaneum* individuals could  
 380 differentiate between strains of the same pathogen (Roth *et al.*, 2009). Thus, the  
 381 immune priming response that we observed is most likely a specific response against  
 382 *B. thuringiensis* and does not represent general protection via an overall upregulation  
 383 of immune components. Finally, we assayed immune priming response using septic  
 384 injury, whereas many pathogens infect their insect hosts via the oral route. However,  
 385 recent studies confirm that both septic injury (Roth *et al.*, 2009) and oral infection  
 386 (Milutinović *et al.*, 2014) with *B. thuringiensis* produce comparable immune priming  
 387 responses in *Tribolium* beetles, suggesting that our infection protocol is unlikely to  
 388 bias our results.

389

390 We would like to end by highlighting several open questions that have emerged from  
 391 our work. (A) Do sex- and stage- specific differences in immune function and  
 392 pathogen susceptibility explain the observed variation in immune priming response?  
 393 (B) Do variable fitness costs of immune priming explain the observed variation in  
 394 immune priming response across populations? (C) Finally, do mechanisms underlying  
 395 various forms of immune priming differ from each other? We suggest that future  
 396 work on insect immune priming should focus on variation in both the mechanistic as  
 397 well as ecological and evolutionary aspects of natural variation in immune priming. In  
 398 particular, experimental manipulation of specific immune priming types across sexes  
 399 and life stages promises to shed light on the complex problem of immune priming  
 400 responses and their variable outcomes in natural populations.



401 **COMPETING INTERESTS**

402

403 We have no competing interests.

404

405 **AUTHOR CONTRIBUTIONS**

406

407 IK and DA conceived of and designed experiments; IK and AP carried out  
408 experiments; IK and DA analyzed data; DA and IK wrote the manuscript with input  
409 from AP. All authors gave final approval for publication.

410

411 **ACKNOWLEDGEMENTS**

412

413 We thank members of the Agashe lab for critical comments on the manuscript, and  
414 NG Prasad for the *B. thuringiensis* strains.

415

416 **FUNDING**

417

418 We acknowledge funding and support from a SERB-DST Young Investigator Grant  
419 to IK, a DST INSPIRE Faculty fellowship to DA, and the National Center for  
420 Biological Sciences (NCBS), India.

421

## 422 TABLES

423

424 **Table 1.** Summary of (A) two way ANOVA for immune priming response with type  
 425 of immune priming and sex as fixed factors (B) one way ANOVA for WLS and ONT  
 426 priming response with sex as a fixed factor (C) two way ANOVA for TG priming  
 427 response with sex and type of parental priming (e.g. larval or adult priming) as fixed  
 428 factors (D) one way ANOVA for immune priming response with life stage-specific  
 429 (larvae or adults) priming as a fixed factor (E) one way ANOVA for immune priming  
 430 response with type of immune priming response as a fixed factor. IP = Immune  
 431 priming, S = Sex, PP = Type of parental priming, LS = Life stage.

| Experiment                                       | Effect | df | SS    | F-ratio | P                |
|--------------------------------------------------|--------|----|-------|---------|------------------|
| <b>A. Impact of type of IP and S</b>             | IP     | 2  | 4.632 | 9.24    | <b>&lt;0.001</b> |
| (excluding L-WLS)                                | S      | 1  | 0.126 | 0.503   | 0.48             |
|                                                  | IP × S | 2  | 0.268 | 0.536   | 0.587            |
| <b>B. Impact of S on A-WLS response</b>          | S      | 1  | 0.044 | 0.37    | 0.54             |
| Impact of S on ONT response                      | S      | 1  | 0.249 | 0.61    | 0.44             |
| <b>C. Impact of S and PP on TG</b>               | S      | 1  | 0.148 | 0.601   | 0.443            |
| response                                         | PP     | 1  | 0.167 | 0.678   | 0.415            |
|                                                  | S×PP   | 1  | 0.000 | 0.003   | 0.951            |
| <b>D. Impact of priming at larvae vs. adults</b> | LS     | 1  | 1.58  | 5.99    | <b>0.016</b>     |
| <b>E. Impact of type of IP (including L-WLS)</b> | IP     | 4  | 5.23  | 5.67    | <b>&lt;0.001</b> |

432

433

434

435

# FIGURE LEGENDS

437

438 **Figure 1.** Experimental design to measure the strength of immune priming responses  
 439 at different stages: (A) Within life stage priming (individuals primed and challenged  
 440 as larvae (L-WLS) or adults (A-WLS)) (B) Ontogenic priming (individuals primed as  
 441 larvae and challenged as adults) (C) Trans-generational maternal priming (females  
 442 primed as larvae (L-TG) or adults (A-TG) were paired with uninfected virgin males  
 443 and their offspring were challenged). Sample sizes are indicated for each treatment  
 444 (priming and control) and sex.

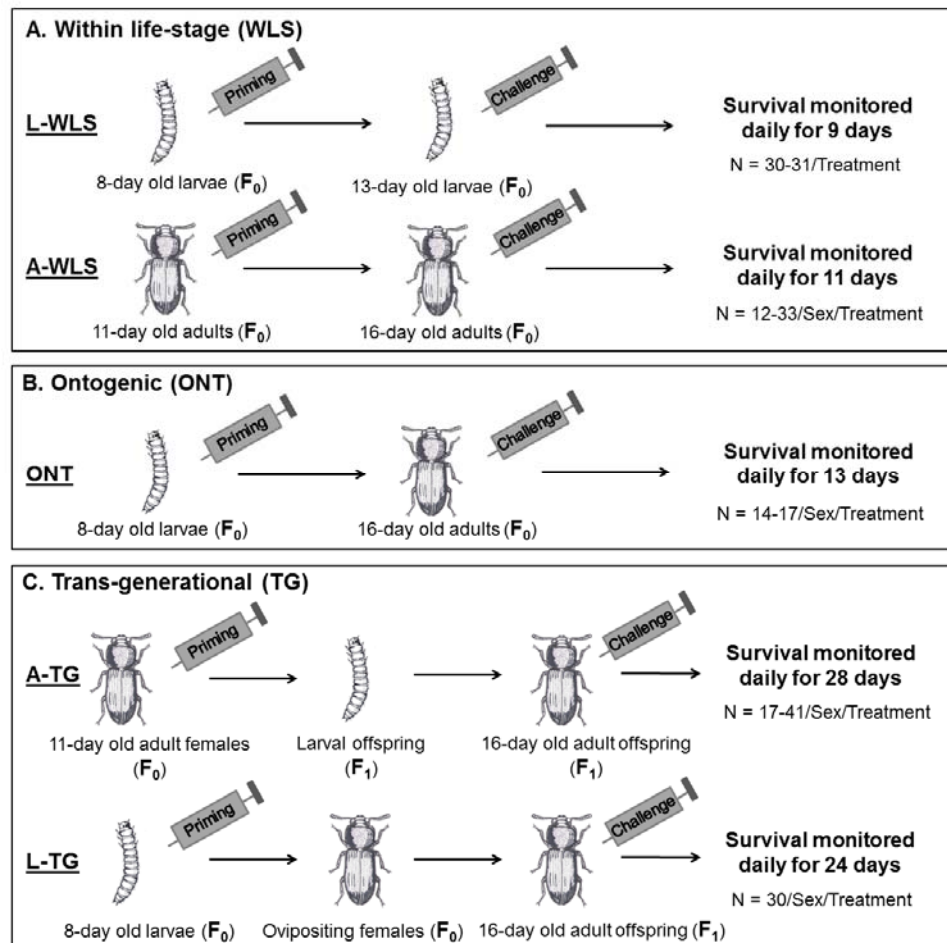

445

446

**Figure 2. Variation in priming response across sexes, life stages and populations.**

(A) Within life stage immune priming (WLS) benefit in larvae and adults (B) Ontogenic (ONT) immune priming benefit (C) Trans-generational (TG) immune priming benefits from adult females (D) Trans-generation (TG) immune priming benefits from larvae. Strength of immune priming response was calculated as the hazard ratio of the proportion of deaths occurring in the unprimed group compared to the primed group under proportional hazard model. Horizontal dashed lines in each panel indicate a hazard ratio of 1. ‘\*’ and ‘-’ denote significant ( $p \leq 0.05$ ) and nonsignificant ( $p > 0.05$ ) impact of immune priming in each stage, sex, and population. Sample sizes for each group are given in Fig. 1.

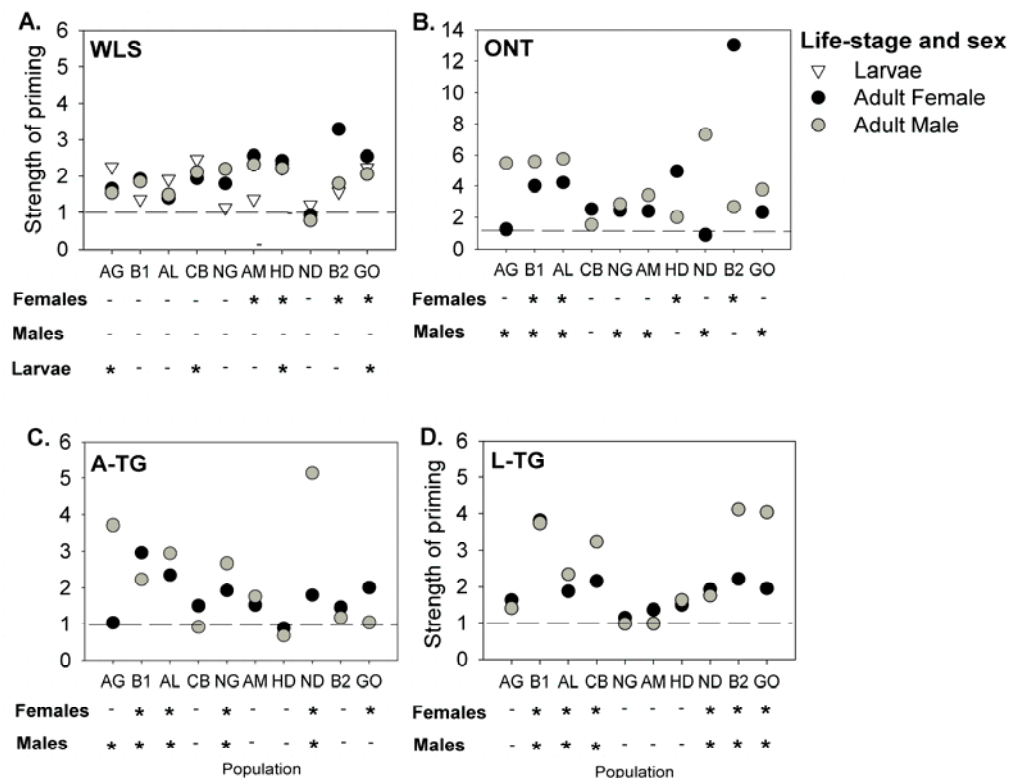

461 **Figure 3. Strength of each type of immune priming response across different life**  
 462 **stages and sexes.** Strength of priming was calculated as described in Fig. 2. Sample  
 463 sizes for each assay are shown in Fig. 1. WLS = within life stage immune priming,  
 464 ONT = ontogenic priming; A-TG = trans-generation benefits of adult (maternal)  
 465 priming; L-TG = trans-generation benefits of larval priming.  
 466

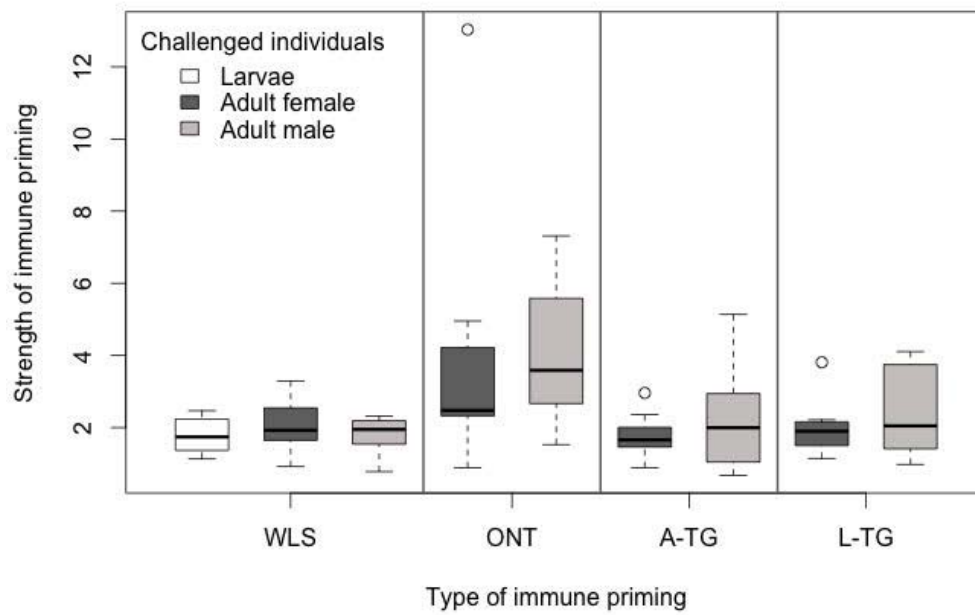

**Figure 4. Associations between within- and trans-generation immune priming.**

Strength of A-TG response in male offspring as a function of (A) strength of WLS immune priming in female adults (B) ONT priming in males. Strength of priming was estimated as described in Fig 2. Each population (labelled) was categorized based on the presence or absence of each type of priming response (using significant hazard ratios as explained in Fig 2), and contingency tables (shown beside each panel) were used to test the association between two types of immune priming across populations. WLS = Within life stage immune priming, A-TG = Trans-generational benefits of adult (maternal) priming, ONT = Ontogenic immune priming.

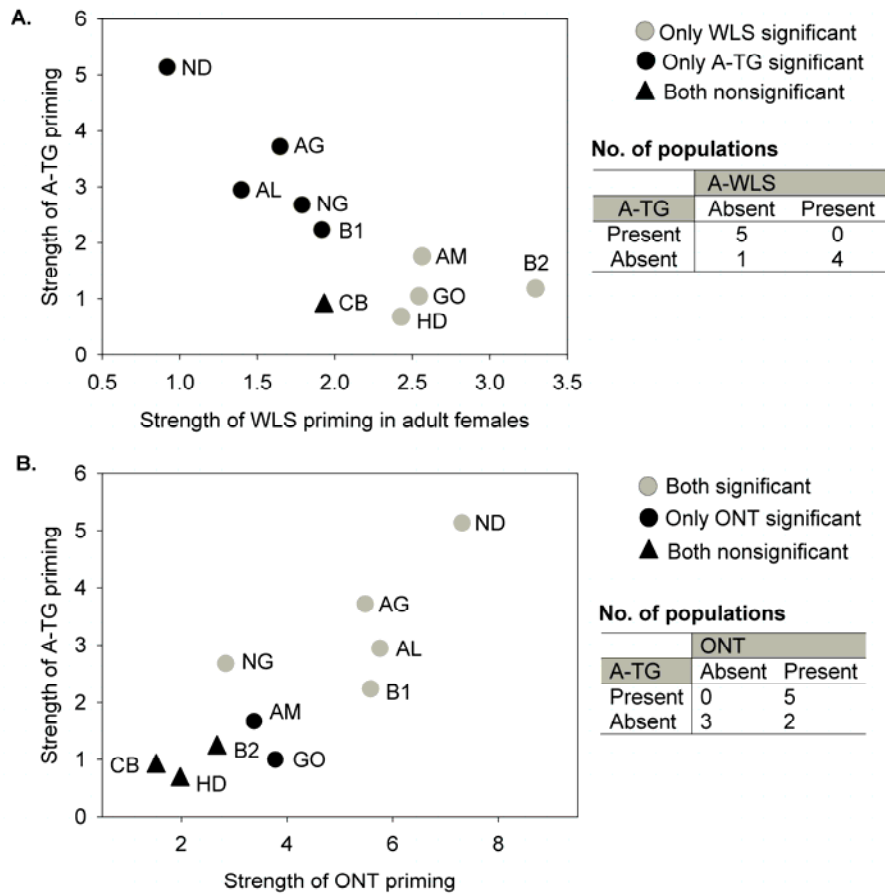

## 486 REFERENCES

487

488 Abdel-Razek, A.S., Salama, H.S., White, N.D.G. & Morris, O.N. 1999. Effect of  
489 *Bacillus thuringiensis* on feeding and energy use by *Plodia interpunctella*  
490 (Lepidoptera: Pyralidae) and *Tribolium castaneum* (Coleoptera: Tenebrionidae).  
491 *Can. Entomol.* **131**: 433–440.

492 Argôlo-filho, R.C. & Loguercio, L.L. 2014. *Bacillus thuringiensis* is an  
493 environmental pathogen and host-specificity has developed as an adaptation to  
494 human-generated ecological niches. *Insects* **5**(1): 62–91.

495 Best, A., Tidbury, H., White, A. & Boots, M. 2013. The evolutionary dynamics of  
496 within-generation immune priming in invertebrate hosts. *J. R. Soc. Interface*  
497 **10**: 20120887.

498 Bravo, A., Likitvivatanavong, S., Gill, S.S. & Soberón, M. 2011. *Bacillus*  
499 *thuringiensis*: A story of a successful bioinsecticide. *Insect. Biochem. Molec.*  
500 *Biol.* **41**: 423–431.

501 Contreras-Garduño, J., Rodríguez, M.C., Rodríguez, M.H., Alvarado-Delgado, A. &  
502 Lanz-Mendoza, H. 2014. Cost of immune priming within generations: Trade-  
503 off between infection and reproduction. *Microb. Infect.* **16**: 261–267.

504 Corby-Harris, V. & Promislow, D.E.L. 2008. Host ecology shapes geographical  
505 variation for resistance to bacterial infection in *Drosophila melanogaster*. *J.*  
506 *Anim. Ecol.* **77**: 768–776.

507 Daukšte, J., Kivleniece, I., Krama, T., Rantala, M.J. & Krams, I. 2012. Senescence in  
508 immune priming and attractiveness in a beetle. *J. Evol. Biol.* **25**: 1298–304.

509 Dubuffet, A., Zanchi, C., Boutet, G., Moreau, J., Teixeira, M. & Moret, Y. 2015.  
510 Trans-generational immune priming protects the eggs only against gram-

511 positive bacteria in the mealworm beetle. *PLoS Pathog.* **11**: e1005178.

512 Freitak, D., Heckel, D.G. & Vogel, H. 2009. Dietary-dependent trans-generational

513 immune priming in an insect herbivore. *Proc. R. Soc. B.* **276**: 2617–24.

514 Gonzalez-Tokman, D.M., Gonzalez-Santoyo, I., Lanz-Mendoza, H. & Cordoba

515 Aguilar, A. 2010. Territorial damselflies do not show immunological priming

516 in the wild. *Physiol. Entomol.* **35**: 364–372.

517 Janeway, C.A. & Medzhitov, R. 2002. Innate immune recognition. *Annu. Rev.*

518 *Immunol.* **20**: 197–216.

519 Kaunisto, K.M. & Suhonen, J. 2013. Parasite burden and the insect immune response:

520 interpopulation comparison. *Parasitology* **140**: 87–94.

521 Khan, I., Prakash, A. & Agashe, D. 2015. Immunosenescence and the ability to

522 survive bacterial infection in the red flour beetle *Tribolium castaneum*. *J. Anim.*

523 *Ecol.* **85**(1): 291–301.

524 Kraaijeveld, A.R. & Van Alphen, J.J. 1995. Geographical variation in encapsulation

525 ability of *Drosophila melanogaster* larvae and evidence for parasitoid-specific

526 components. *Evol. Ecol.* **9**: 10–17.

527 Lambert, B. & Peferoen, M. 2014. Promise of Insecticidal *Bacillus thuringiensis* facts

528 and mysteries about a successful biopesticide. *Bioscience* **42**: 112–122.

529 Miller, M.R., White, A. & Boots, M. 2006. The evolution of parasites in response to

530 tolerance in their hosts: the good, the bad, and apparent commensalism.

531 *Evolution Int. J. Org. Evolution.* **60**: 945–956.

532 Milutinović, B., Fritzlar, S. & Kurtz, J. 2014. Increased survival in the red flour beetle

533 after oral priming with bacteria-conditioned media. *J. Innate Immun.* **6**: 306–

534 314.

535 Miyashita, A., Kizaki, H., Kawasaki, K., Sekimizu, K. & Kaito, C. 2014. Primed



536 immune responses to gram-negative peptidoglycans confer infection resistance  
537 in silkworms. *J. Biol. Chem.* **289**: 14412–14421.

538 Moreau, J., Martinaud, G., Troussard, J.P., Zanchi, C. & Moret, Y. 2012. Trans-  
539 generational immune priming is constrained by the maternal immune response  
540 in an insect. *Oikos* **121**: 1828–1832.

541 Moreno-García, M., Vargas, V., Ramírez-Bello, I., Hernández-Martínez, G. & Lanz-  
542 Mendoza, H. 2015. Bacterial exposure at the larval stage induced sexual  
543 immune dimorphism and priming in adult *Aedes aegypti* mosquitoes. *Plos One*  
544 **10**: e0133240.

545 Nunn, C.L., Lindenfors, P., Pursall, E.R. & Rolff, J. 2009. On sexual dimorphism in  
546 immune function. *Philos. Trans. R. Soc. Lond. B. Biol. Sci.* **364**: 61–9.

547 Pham, L.N., Dionne, M.S., Shirasu-Hiza, M. & Schneider, D.S. 2007. A specific  
548 primed immune response in *Drosophila* is dependent on phagocytes. *PLoS*  
549 *Pathog.* **3**: e26.

550 Reber, A. & Chapuisat, M. 2012. No evidence for immune priming in ants exposed to  
551 a fungal pathogen. *PloS one* **7**: e35372.

552 Rolff, J. 2002. Bateman's principle and immunity. *Proc. R. Soc. B.* **269**: 867–72.

553 Roth, O., Joop, G., Eggert, H., Hilbert, J., Daniel, J., Schmid-Hempel, P. & Kurtz, J.  
554 2010. Paternally derived immune priming for offspring in the red flour beetle,  
555 *Tribolium castaneum*. *J. Anim. Ecol.* **79**: 403–13.

556 Roth, O., Sadd, B.M., Schmid-Hempel P. & Kurtz, J. 2009. Strain-specific priming of  
557 resistance in the red flour beetle, *Tribolium castaneum*. *Proc. R. Soc. B.* **276**:  
558 145–51.

559 Roy, B.A. & Kirchner, J.W. 2000. Evolutionary dynamics of pathogen resistance and  
560 tolerance. *Evolution Int. J. Org. Evolution.* **54**: 51–63.

561 Sadd, B.M. & Schmid-Hempel, P. 2006. Insect immunity shows specificity in  
562 protection upon secondary pathogen exposure. *Curr. Biol.* **16**: 1206–10.

563 Sadd, B.M. & Schmid-Hempel, P. 2009. A distinct infection cost associated with  
564 trans-generational priming of antibacterial immunity in bumble-bees. *Biol. Lett.*  
565 **5**: 798–801.

566 Sutton, J.T., Nakagawa, S., Robertson, B.C. & Jamieson, I.G. 2011. Disentangling the  
567 roles of natural selection and genetic drift in shaping variation at MHC  
568 immunity genes. *Mol. Ecol.* **20**: 4408–4420.

569 Tate, A.T. & Graham, A.L. 2015. Trans-generational priming of resistance in wild  
570 flour beetles reflects the primed phenotypes of laboratory populations and is  
571 inhibited by co-infection with a common parasite. *Funct. Ecol.* **29**(8): 1059-  
572 1069.

573 Tate, A.T. & Rudolf, V.H.W. 2012. Impact of life stage specific immune priming on  
574 invertebrate disease dynamics. *Oikos* **121**: 1083–1092.

575 Thomas, A.M. & Rudolf, V.H.W. 2010. Challenges of metamorphosis in invertebrate  
576 hosts: maintaining parasite resistance across life-history stages. *Ecol. Entomol.*  
577 **35**: 200–205.

578 Tidbury, H.J., Best, A. & Boots, M. 2012. The epidemiological consequences of  
579 immune priming. *Proc. R. Soc. B.* **279**: 4505–12.

580 Tidbury, H.J., Pedersen, A.B. & Boots, M. 2011. Within and transgenerational  
581 immune priming in an insect to a DNA virus. *Proc. R. Soc. B.* **278**: 871–6.

582 Zanchi, C., Troussard, J.P., Moreau, J. & Moret, Y. 2012. Relationship between  
583 maternal transfer of immunity and mother fecundity in an insect. *Proc. R. Soc.*  
584 *B.* **279**: 3223–30.

585

## A. Within life-stage (WLS)

### L-WLS

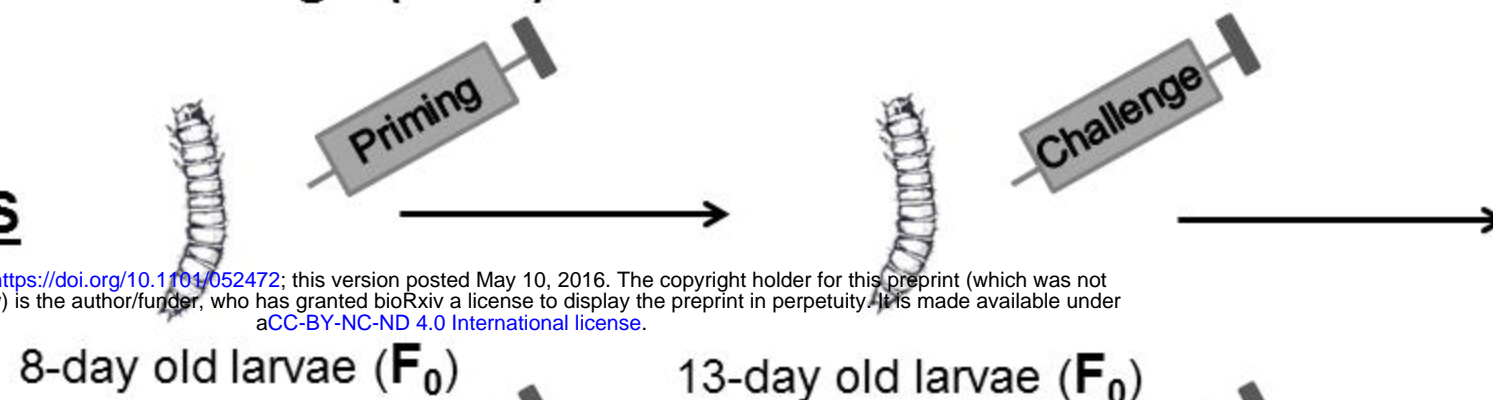

Survival monitored  
daily for 9 days

N = 30-31/Treatment

### A-WLS

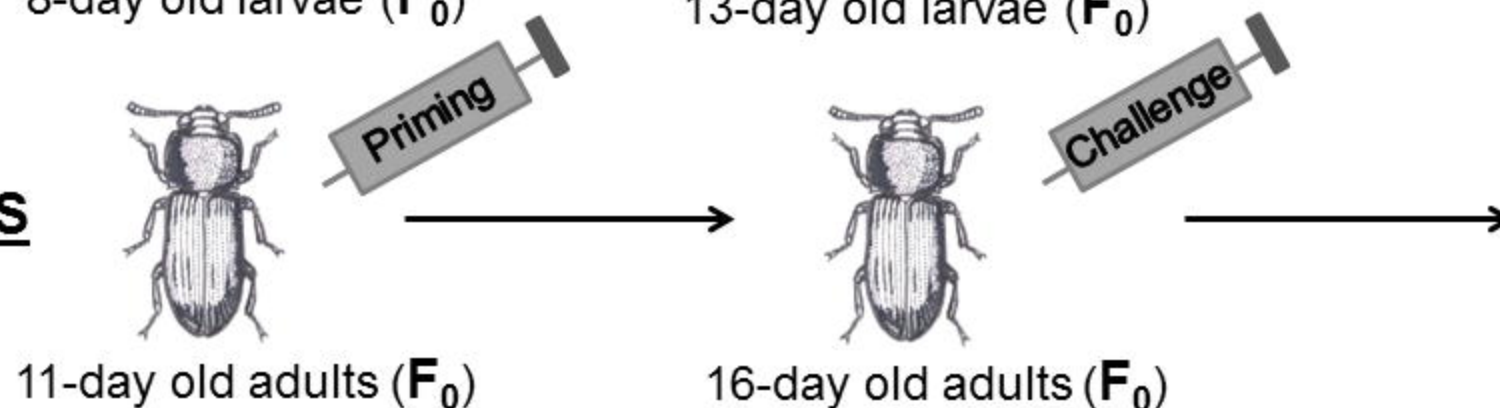

Survival monitored  
daily for 11 days

N = 12-33/Sex/Treatment

## B. Ontogenic (ONT)

### ONT

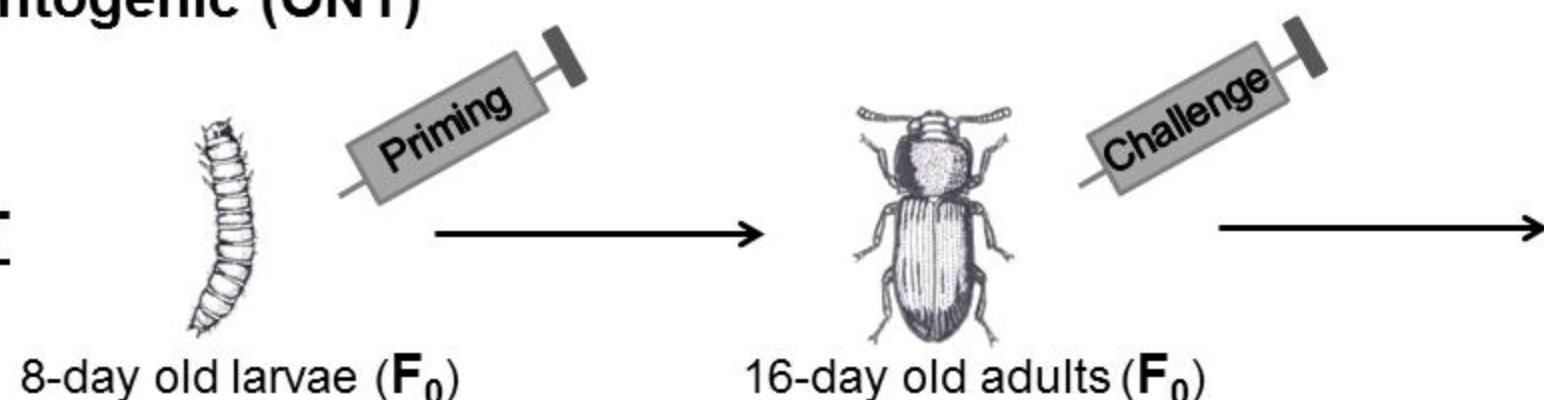

Survival monitored  
daily for 13 days

N = 14-17/Sex/Treatment

## C. Trans-generational (TG)

### A-TG

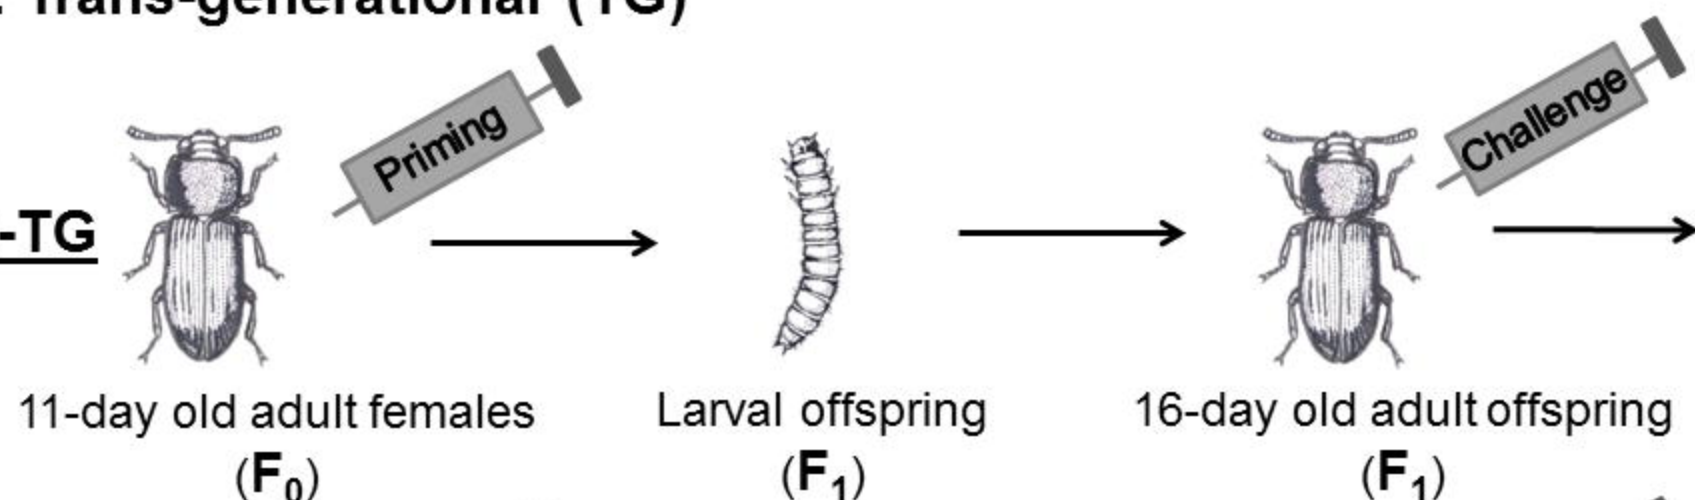

Survival monitored  
daily for 28 days

N = 17-41/Sex/Treatment

### L-TG

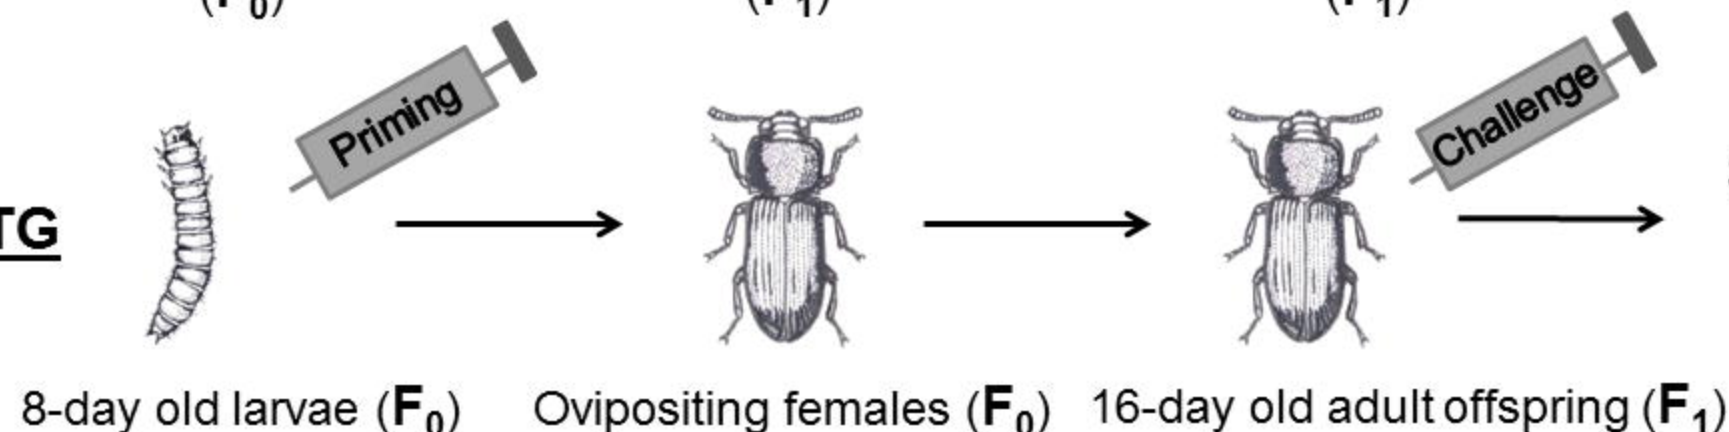

Survival monitored  
daily for 24 days

N = 30/Sex/Treatment

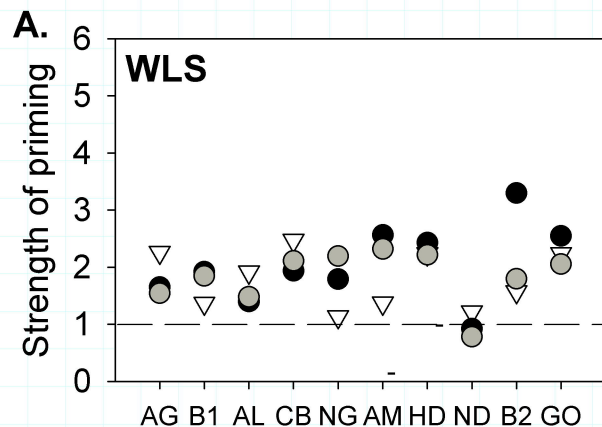

**Females**

**Males**

**Larvae**

|   |   |   |   |   |   |   |   |   |   |
|---|---|---|---|---|---|---|---|---|---|
| - | - | - | - | - | * | * | - | * | * |
| - | - | - | - | - | - | - | - | - | - |
| * | - | - | * | - | - | * | - | - | * |

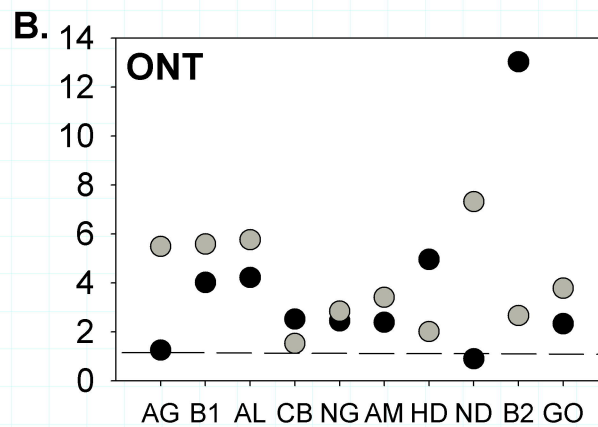

**Females**

**Males**

|   |   |   |   |   |   |   |   |   |   |
|---|---|---|---|---|---|---|---|---|---|
| - | * | * | - | - | - | * | - | * | - |
| * | * | * | - | * | * | - | * | - | * |

**Life-stage and sex**

▽ Larvae

● Adult Female

● Adult Male

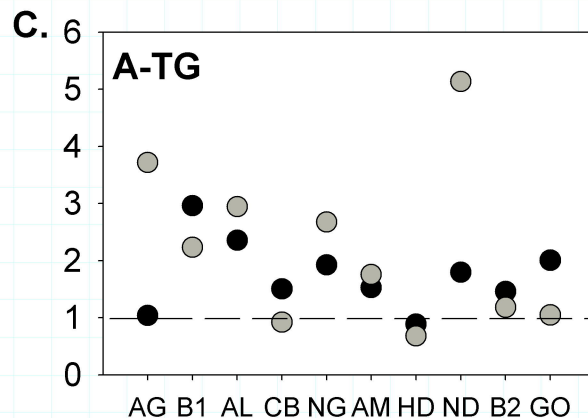

**Females**

**Males**

|   |   |   |   |   |   |   |   |   |   |
|---|---|---|---|---|---|---|---|---|---|
| - | * | * | - | * | - | - | * | - | * |
| * | * | * | - | * | - | - | * | - | - |

Population

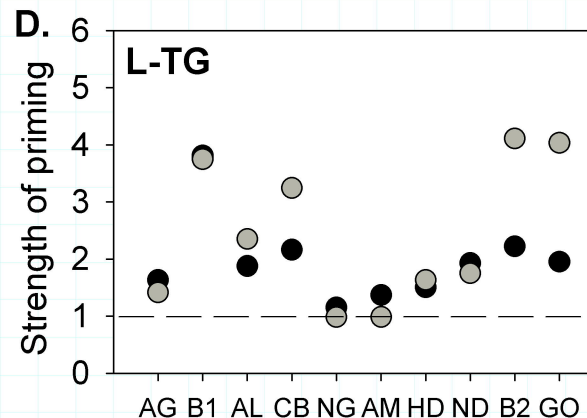

**Females**

**Males**

|   |   |   |   |   |   |   |   |   |   |
|---|---|---|---|---|---|---|---|---|---|
| - | * | * | * | - | - | - | * | * | * |
| - | * | * | * | - | - | - | * | * | * |

Population

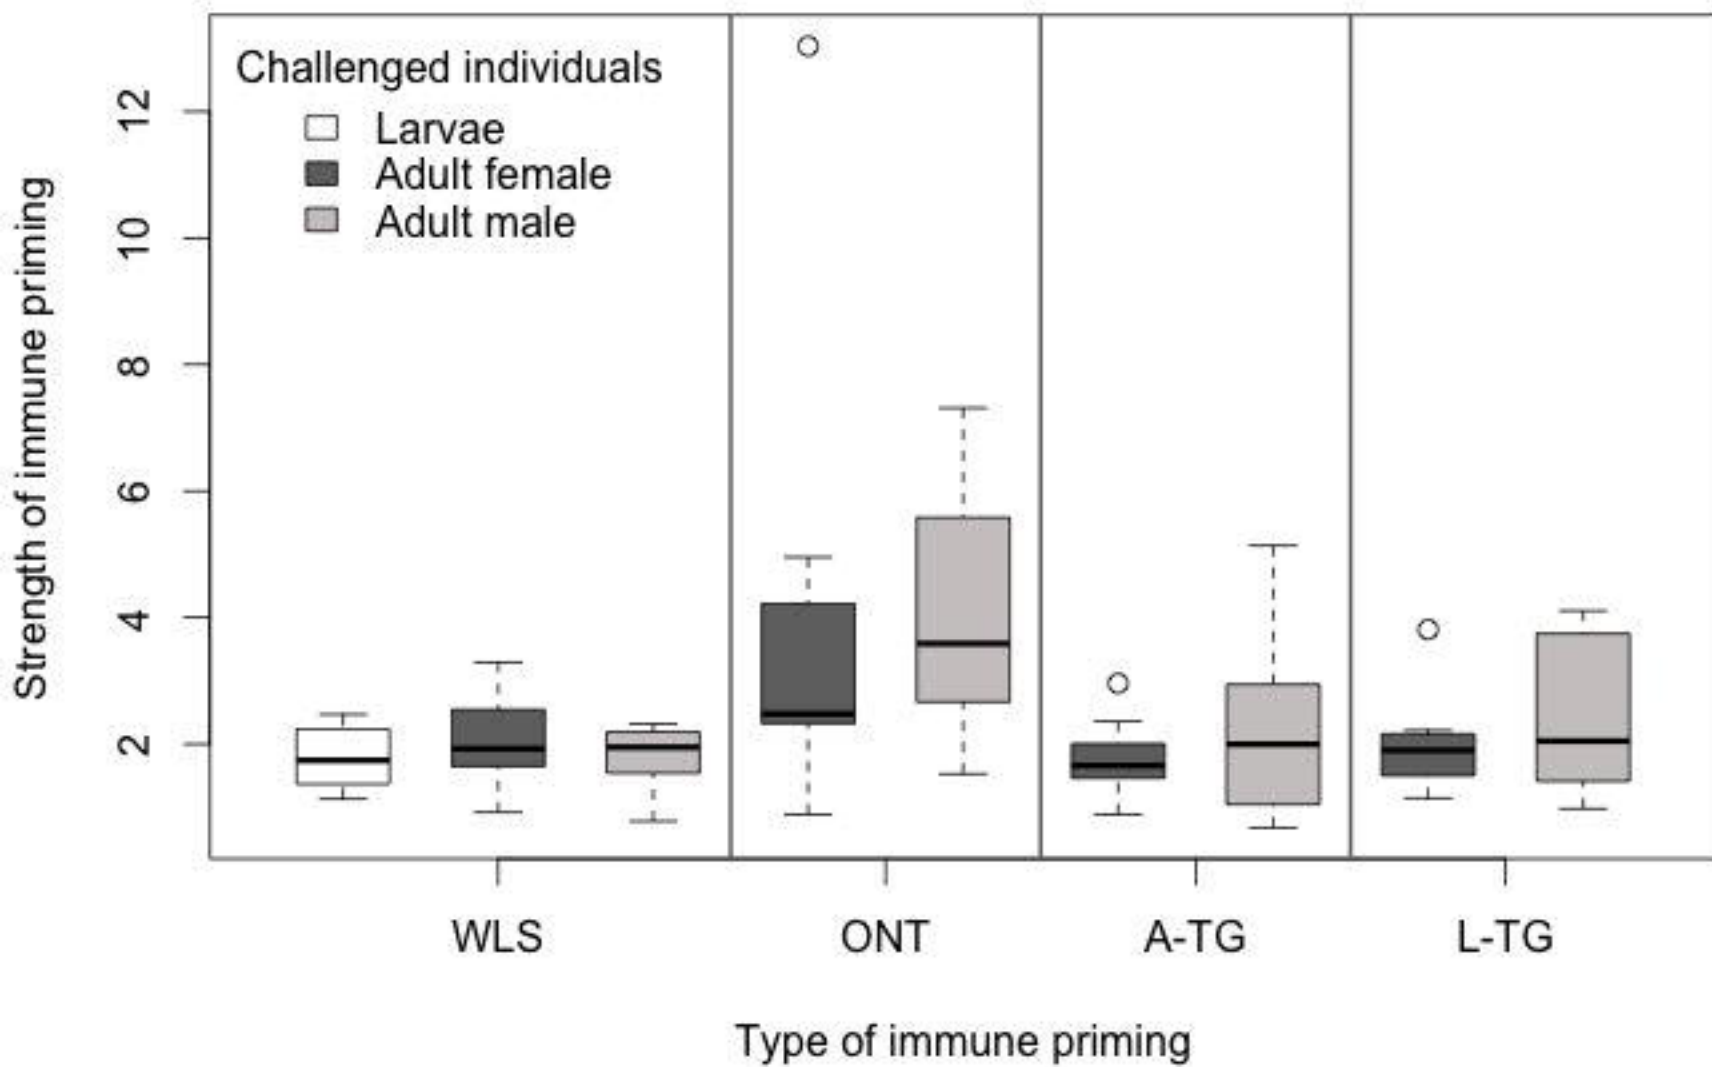

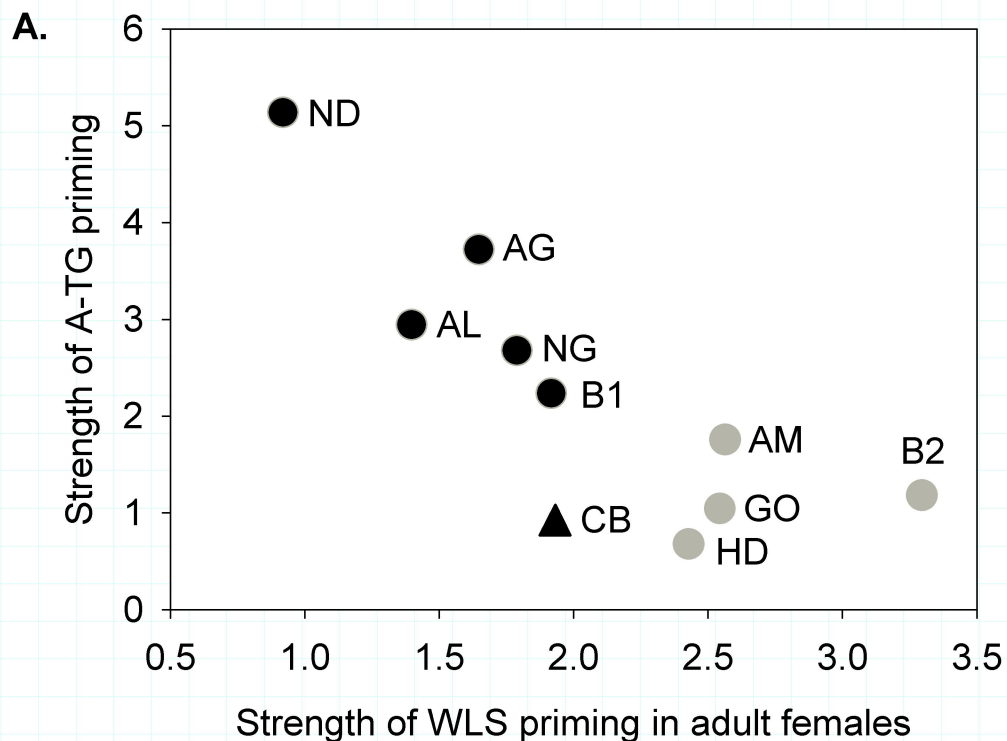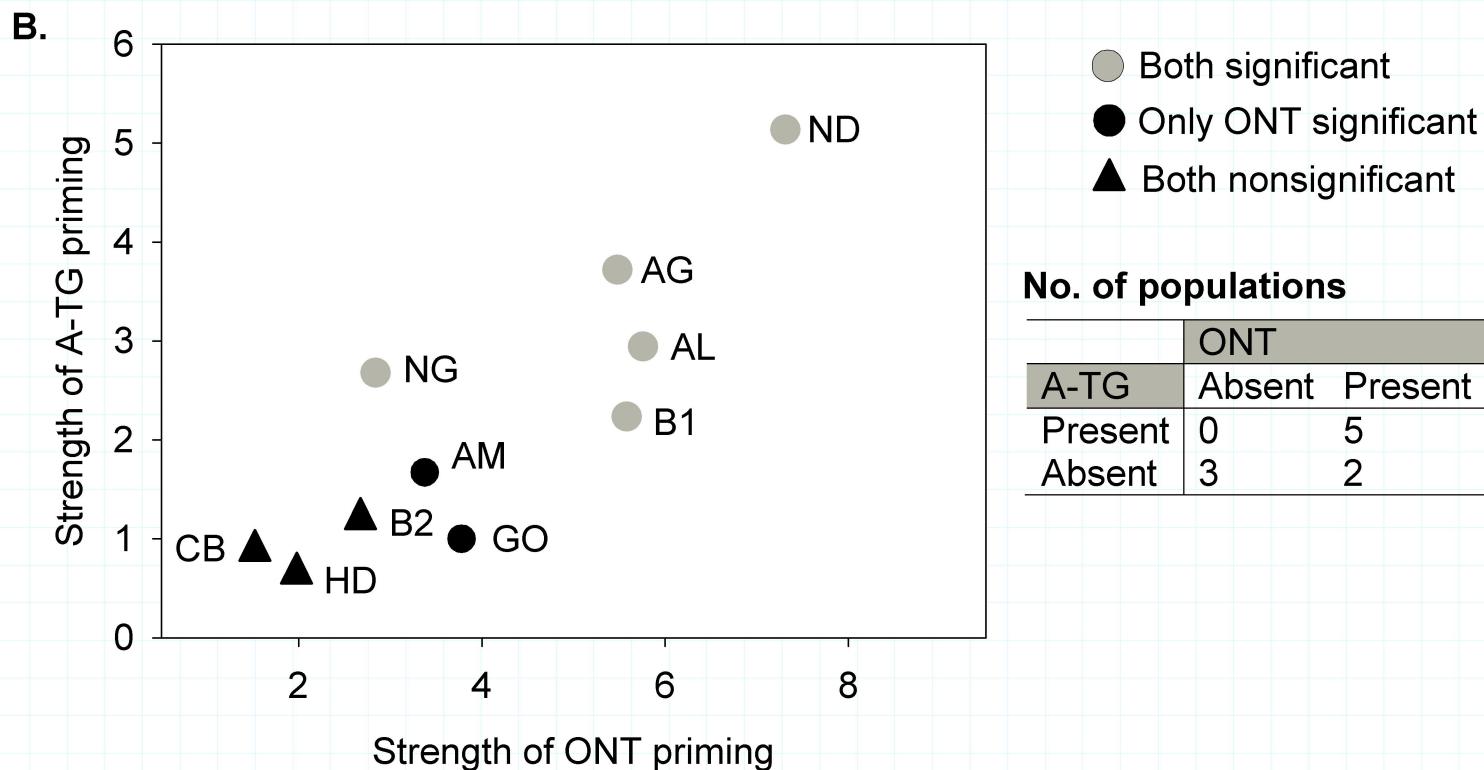

Source: https://www.biorxiv.org/content/10.1101/052472v1.full.pdf
